# Supplementary material for: Multi-center, pragmatic, cluster-randomized, controlled trial of standardized peritoneal dialysis (PD) training versus usual care on PD-related infections (the TEACH-PD trial): trial protocol
Source: Springer Nature journal article supplement (doi:10.1186/s13063-023-07715-0), 2023-11-14
Supplement: MOESM1 [file 26302598]

## **TEACH-PD Trial: List of study sites**

|                                                        |
|--------------------------------------------------------|
| Auckland Hospital                                      |
| Austin Hospital                                        |
| Barwon Health                                          |
| Blacktown Mt Druitt Hospital - Nepean Hospital         |
| Cairns Hospital                                        |
| Canberra Hospital                                      |
| Christchurch Hospital                                  |
| Dunedin Hospital                                       |
| Fiona Stanley Hospital                                 |
| Gold Coast University Hospital                         |
| Gosford Hospital                                       |
| Hawke's Bay Hospital                                   |
| Launceston Hospital                                    |
| Lismore Base Hospital                                  |
| Liverpool Hospital                                     |
| Logan Hospital                                         |
| Mackay Base Hospital                                   |
| Middlemore Hospital                                    |
| Monash Medical                                         |
| North Shore Hospital & Waitakere Hospital              |
| Orange Health Service                                  |
| Palmerston North Hospital (includes Wanganui Hospital) |
| Prince of Wales Hospital                               |
| Princess Alexandra Hospital                            |
| Royal Adelaide Hospital                                |
| Royal Brisbane & Women's Hospital                      |
| Royal Darwin Hospital                                  |
| Royal Hobart Hospital                                  |
| Royal Melbourne Hospital                               |
| Royal North Shore Hospital                             |
| Royal Perth Hospital                                   |
| Royal Prince Alfred Hospital – Concord Hospital        |
| Sir Charles Gairdner Hospital                          |
| St George Hospital                                     |
| St Vincent's Hospital Melbourne                        |
| St Vincent's Health Sydney                             |
| Sunshine Coast University Hospital - Nambour Hospital  |
| Tamworth Hospital                                      |
| Taranaki Hospital                                      |
| Toowoomba Hospital                                     |
| The Tweed Hospital                                     |
| Waikato Hospital (includes Gisborne Hospital)          |

|                                                             |
|-------------------------------------------------------------|
| Wellington Hospital (Nelson Hospital and Blenheim Hospital) |
|-------------------------------------------------------------|

|                    |
|--------------------|
| Whangarei Hospital |
|--------------------|
