# Supplementary material for: Multi-center, pragmatic, cluster-randomized, controlled trial of standardized peritoneal dialysis (PD) training versus usual care on PD-related infections (the TEACH-PD trial): trial protocol
Source: Springer Nature journal article supplement (doi:10.1186/s13063-023-07715-0), 2023-11-14
Supplement: MOESM4 [file 26302598]

23 September 2019

Professor Suetonia Palmer  
Department of Medicine  
University of Otago Christchurch  
2 Riccarton Ave  
Christchurch 8140

Dear Professor Palmer,

|                        |                                                                                                                                                                                                                         |
|------------------------|-------------------------------------------------------------------------------------------------------------------------------------------------------------------------------------------------------------------------|
| Re: <b>Ethics ref:</b> | <b>19/NTB/133</b>                                                                                                                                                                                                       |
| Study title:           | A pragmatic, registry-based, international, cluster-randomised controlled trial examining the use of TEACH-PD training modules for incident PD patients versus existing practices on the rate of PD-related infections. |

I am pleased to advise that this application has been approved by the Northern B Health and Disability Ethics Committee. This decision was made through the HDEC-Expedited Review pathway.

#### Conditions of HDEC approval

HDEC approval for this study is subject to the following conditions being met prior to the commencement of the study in New Zealand. It is your responsibility, and that of the study's sponsor, to ensure that these conditions are met. No further review by the Northern B Health and Disability Ethics Committee is required.

Standard conditions:

1. Before the study commences at *any* locality in New Zealand, all relevant regulatory approvals must be obtained.
2. Before the study commences at *any* locality in New Zealand, it must be registered in a clinical trials registry. This should be a WHO-approved registry (such as the Australia New Zealand Clinical Trials Registry, [www.anzctr.org.au](http://www.anzctr.org.au)) or <https://clinicaltrials.gov/>.
3. Before the study commences at *each given* locality in New Zealand, it must be authorised by that locality in Online Forms. Locality authorisation confirms that the locality is suitable for the safe and effective conduct of the study, and that local research governance issues have been addressed.

Please refer to the *Standard Operating Procedures for Health and Disability Ethics Committees* (available on [www.ethics.health.govt.nz](http://www.ethics.health.govt.nz)) for HDEC requirements relating to amendments and other post-approval processes.

**Your next progress report is due by 23 September 2020.**

Participant access to ACC

The Northern B Health and Disability Ethics Committee is satisfied that your study is not a clinical trial that is to be conducted principally for the benefit of the manufacturer or distributor of the medicine or item being trialled. Participants injured as a result of treatment received as part of your study may therefore be eligible for publicly-funded compensation through the Accident Compensation Corporation (ACC).

Please don't hesitate to contact the HDEC secretariat for further information. We wish you all the best for your study.

Yours sincerely,

A handwritten signature in black ink, appearing to read 'K O'Connor', with a long horizontal flourish extending to the right.

Ms Kate O'Connor  
Chairperson  
Northern B Health and Disability Ethics Committee

Encl: appendix A: documents submitted  
appendix B: statement of compliance and list of members

**Appendix A**  
**Documents submitted**

| <i>Document</i>                                                                              | <i>Version</i> | <i>Date</i>       |
|----------------------------------------------------------------------------------------------|----------------|-------------------|
| CV for CI: CV for Co-ordinating investigator                                                 | V1.0           | 03 June 2019      |
| Evidence of scientific review: AKTN Scientific Committee review 11May2017                    | 1              | 11 May 2017       |
| PIS/CF: TEACH-PD NZ PICF A                                                                   | V1.1           | 13 September 2019 |
| PIS/CF: TEACH-PD NZ PICF B                                                                   | V1.1           | 13 September 2019 |
| Evidence of scientific review: HRC Reviewer scientific assessments March 2019                | 2019           | 03 March 2019     |
| CVs for other Investigators: CV for Other investigator_Chembo                                | V1.0           | 29 May 2019       |
| Survey/questionnaire: EQ-5D-5L NZ English version                                            | V1.0           | 03 June 2019      |
| CVs for other Investigators: CV for Other Investigator_Hayat                                 | v1.0           | 29 May 2019       |
| CVs for other Investigators: CV for Other investigator_Reynolds                              | V1.0           | 08 June 2019      |
| CVs for other Investigators: CV for Other investigator_Maher                                 | V1.0           | 11 June 2019      |
| CVs for other Investigators: CV for Other investigator_Kendrick-Jones                        | v1.0           | 08 June 2019      |
| CVs for other Investigators: CV for Other investigator_Saweirs                               | v1.0           | 29 May 2019       |
| CVs for other Investigators: CV for Other investigator_Putt                                  | v1.0           | 04 June 2019      |
| CVs for other Investigators: CV for Other investigator_Nguyen                                | v1.0           | 11 June 2019      |
| CVs for other Investigators: CV for Other investigator_Tan                                   | v1.0           | 19 September 2018 |
| Evidence of CI indemnity                                                                     | 18-19          | 05 December 2018  |
| Evidence of CI indemnity                                                                     | 18-19          | 05 December 2018  |
| Protocol: TEACH-PD CRCT Protocol New Zealand Specific Appendix                               | V1.1           | 20 September 2019 |
| Health Research Council of NZ funding decision                                               | Letter         | 31 May 2019       |
| Evidence of consultation with Kaitohutohu Rangahau Maori at University of Otago Christchurch | V1.0           | 06 November 2018  |
| TEACH-PD trial infographic New Zealand                                                       | V1.0           | 12 June 2019      |
| Covering Letter: Covering letter TEACH-PD                                                    | V1.0           | 18 August 2019    |
| CVs for other Investigators: CV for Other investigator_Aday                                  | V1.0           | 08 July 2019      |
| Evidence of sponsor insurance                                                                | 18-19          | 05 December 2018  |
| Evidence of sponsor insurance                                                                | 18-19          | 05 December 2018  |
| Protocol: TEACH-PD CRCT Protocol                                                             | V1.0           | 30 January 2019   |
| Application                                                                                  |                | 20 August 2019    |
| PIS/CF: TEACH-PD NZ PICF B_tracked                                                           | V1.1           | 13 September 2019 |
| PIS/CF: TEACH-PD NZ PICF A_tracked                                                           | V1.1           | 13 September 2019 |
| Response to Committee                                                                        | 1              | 20 September 2019 |
| Response to Request for Further Information                                                  |                |                   |

## Appendix B Statement of compliance and list of members

### Statement of compliance

The Northern B Health and Disability Ethics Committee:

- is constituted in accordance with its Terms of Reference
- operates in accordance with the *Standard Operating Procedures for Health and Disability Ethics Committees*, and with the principles of international good clinical practice (GCP)
- is approved by the Health Research Council of New Zealand's Ethics Committee for the purposes of section 25(1)(c) of the Health Research Council Act 1990
- is registered (number 00008715) with the US Department of Health and Human services' Office for Human Research Protection (OHRP).

### List of members

| <i>Name</i>                | <i>Category</i>                                                 | <i>Appointed</i> | <i>Term Expires</i> |
|----------------------------|-----------------------------------------------------------------|------------------|---------------------|
| Mr John Hancock            | Lay (the law)                                                   | 14/12/2015       | 14/12/2018          |
| Dr Nora Lynch              | Non-lay (health/disability service provision)                   | 19/03/2015       | 19/03/2022          |
| Miss Tangihaere Macfarlane | Lay (consumer/community perspectives)                           | 20/05/2017       | 20/05/2020          |
| Mrs Kate O'Connor          | Lay (ethical/moral reasoning)                                   | 14/12/2015       | 14/12/2018          |
| Mrs Stephanie Pollard      | Non-lay (intervention studies)                                  | 01/07/2015       | 01/07/2018          |
| Mrs Leesa Russell          | Non-lay (intervention studies), Non-lay (observational studies) | 14/12/2015       | 14/12/2018          |
| Ms Susan Sherrard          | Lay (consumer/community perspectives)                           | 19/03/2019       | 19/03/2022          |
| Mrs Jane Wylie             | Non-lay (intervention studies)                                  | 20/05/2017       | 20/05/2020          |

Unless members resign, vacate or are removed from their office, every member of HDEC shall continue in office until their successor comes into office (HDEC Terms of Reference)

<http://www.ethics.health.govt.nz>
